# Supplementary material for: Spatially Dense 3D Facial Heritability and Modules of Co-heritability in a Father-Offspring Design
Source: PubMed Central journal article supplement (PMC6252335; doi:10.3389/fgene.2018.00554), 2018-11-19
Supplement: Data_Sheet_9.pdf [file Data_Sheet_9.pdf]

**Supplementary Table 2. Mean squared error of the modular regression models.**

(\*) non-significant heritability estimates. MSE, mean squared error.

| Facial segmentation |         | Sons               |      | Daughters          |      | Facial segmentation |         | Sons               |      | Daughters          |      |
|---------------------|---------|--------------------|------|--------------------|------|---------------------|---------|--------------------|------|--------------------|------|
| level               | segment | h <sup>2</sup> (%) | MSE  | h <sup>2</sup> (%) | MSE  | level               | segment | h <sup>2</sup> (%) | MSE  | h <sup>2</sup> (%) | MSE  |
| 0                   | 1       | 82                 | 8.40 | 72                 | 7.70 | 5                   | 32      | 42                 | 0.17 | 33*                | 0.14 |
| 1                   | 2       | 73                 | 6.73 | 69                 | 6.11 |                     | 33      | 51                 | 0.49 | 46                 | 0.40 |
|                     | 3       | 70                 | 2.72 | 63                 | 2.51 |                     | 34      | 48                 | 1.39 | 52                 | 1.22 |
| 2                   | 4       | 58                 | 4.15 | 57                 | 3.55 |                     | 35      | 42*                | 0.23 | 42                 | 0.19 |
|                     | 5       | 80                 | 2.68 | 71                 | 2.37 |                     | 36      | 55                 | 0.04 | 42                 | 0.03 |
|                     | 6       | 59                 | 0.84 | 50                 | 0.76 |                     | 37      | 45                 | 0.03 | 36                 | 0.03 |
|                     | 7       | 72                 | 1.84 | 67                 | 1.67 |                     | 38      | 49                 | 0.84 | 46                 | 0.73 |
| 3                   | 8       | 53*                | 2.78 | 55                 | 2.36 |                     | 39      | 36*                | 0.08 | 44                 | 0.08 |
|                     | 9       | 50*                | 1.27 | 47                 | 1.14 |                     | 40      | 63                 | 1.41 | 56                 | 1.08 |
|                     | 10      | 76                 | 2.99 | 66                 | 2.40 |                     | 41      | 54                 | 0.16 | 42                 | 0.13 |
|                     | 11      | 59                 | 0.54 | 53                 | 0.49 |                     | 42      | 64                 | 0.16 | 59                 | 0.13 |
|                     | 12      | 58                 | 0.63 | 50                 | 0.60 |                     | 43      | 60                 | 0.56 | 62                 | 0.52 |
|                     | 13      | 48                 | 0.16 | 40                 | 0.14 |                     | 44      | 43                 | 0.06 | 37                 | 0.05 |
|                     | 14      | 69                 | 1.13 | 64                 | 1.04 |                     | 45      | 51                 | 0.07 | 47                 | 0.06 |
|                     | 15      | 53                 | 0.41 | 49                 | 0.34 |                     | 46      | 35*                | 0.03 | 33*                | 0.03 |
| 4                   | 16      | 46                 | 0.57 | 43                 | 0.48 |                     | 47      | 44                 | 0.04 | 41                 | 0.04 |
|                     | 17      | 48*                | 2.07 | 52                 | 1.76 |                     | 48      | 48                 | 0.19 | 34*                | 0.18 |
|                     | 18      | 45                 | 0.11 | 39                 | 0.09 |                     | 49      | 47                 | 0.18 | 42                 | 0.16 |
|                     | 19      | 54                 | 0.92 | 50                 | 0.84 |                     | 50      | 38*                | 0.08 | 34*                | 0.08 |
|                     | 20      | 66                 | 1.63 | 56                 | 1.32 |                     | 51      | 40                 | 0.04 | 34                 | 0.04 |
|                     | 21      | 70                 | 0.92 | 67                 | 0.77 |                     | 52      | 42*                | 0.02 | 32*                | 0.02 |
|                     | 22      | 53                 | 0.20 | 49                 | 0.19 |                     | 53      | 42*                | 0.01 | 37                 | 0.01 |
|                     | 23      | 46*                | 0.14 | 45                 | 0.11 |                     | 54      | 35                 | 0.01 | 37                 | 0.01 |
|                     | 24      | 51                 | 0.48 | 39*                | 0.46 |                     | 55      | 34                 | 0.02 | 34                 | 0.01 |
|                     | 25      | 44*                | 0.13 | 38*                | 0.13 |                     | 56      | 41*                | 0.29 | 48                 | 0.26 |
|                     | 26      | 47                 | 0.04 | 36*                | 0.04 |                     | 57      | 51                 | 0.51 | 51                 | 0.50 |
|                     | 27      | 44                 | 0.05 | 43                 | 0.04 |                     | 58      | 63                 | 0.58 | 65                 | 0.54 |
|                     | 28      | 49                 | 0.90 | 51                 | 0.85 |                     | 59      | 52                 | 0.10 | 53                 | 0.09 |
|                     | 29      | 61                 | 0.81 | 65                 | 0.72 |                     | 60      | 41                 | 0.02 | 45                 | 0.02 |
|                     | 30      | 47                 | 0.05 | 48                 | 0.04 |                     | 61      | 47                 | 0.01 | 45                 | 0.01 |
|                     | 31      | 49                 | 0.28 | 46                 | 0.23 |                     | 62      | 46                 | 0.20 | 42                 | 0.17 |
|                     |         |                    |      |                    |      |                     | 63      | 41                 | 0.05 | 41                 | 0.04 |
